# Supplementary material for: Synthesis and characterization of NiCo-X (X = OH, S, Se, P) nanodiscs and comparison of their electrocatalytic performances in an electrochemical sensing platform
Source: Royal Society of Chemistry journal article supplement (doi:10.1039/d2nj02361j), 2022-01-01
Supplement: d2nj02361j1.pdf [file d2nj02361j1.pdf]

## Supplementary Material

### **Synthesis and characterization of NiCo-X (X= OH, S, Se, P) nanodiscs and comparison of their electrocatalytic performances in electrochemical sensing platform**

Somayeh Farokhi, Mahmoud Roushani\*, Hadi Hosseini

*Department of Chemistry, Faculty of Sciences, Ilam University, Ilam, P. O. BOX. 69315-516,*

*Iran*

\* Corresponding author :Tel/fax: +98 84 32227022

E-mail address: [m.roushani@ilam.ac.ir](mailto:m.roushani@ilam.ac.ir) and [mahmoudroushani@yahoo.com](mailto:mahmoudroushani@yahoo.com) (M. Roushani)

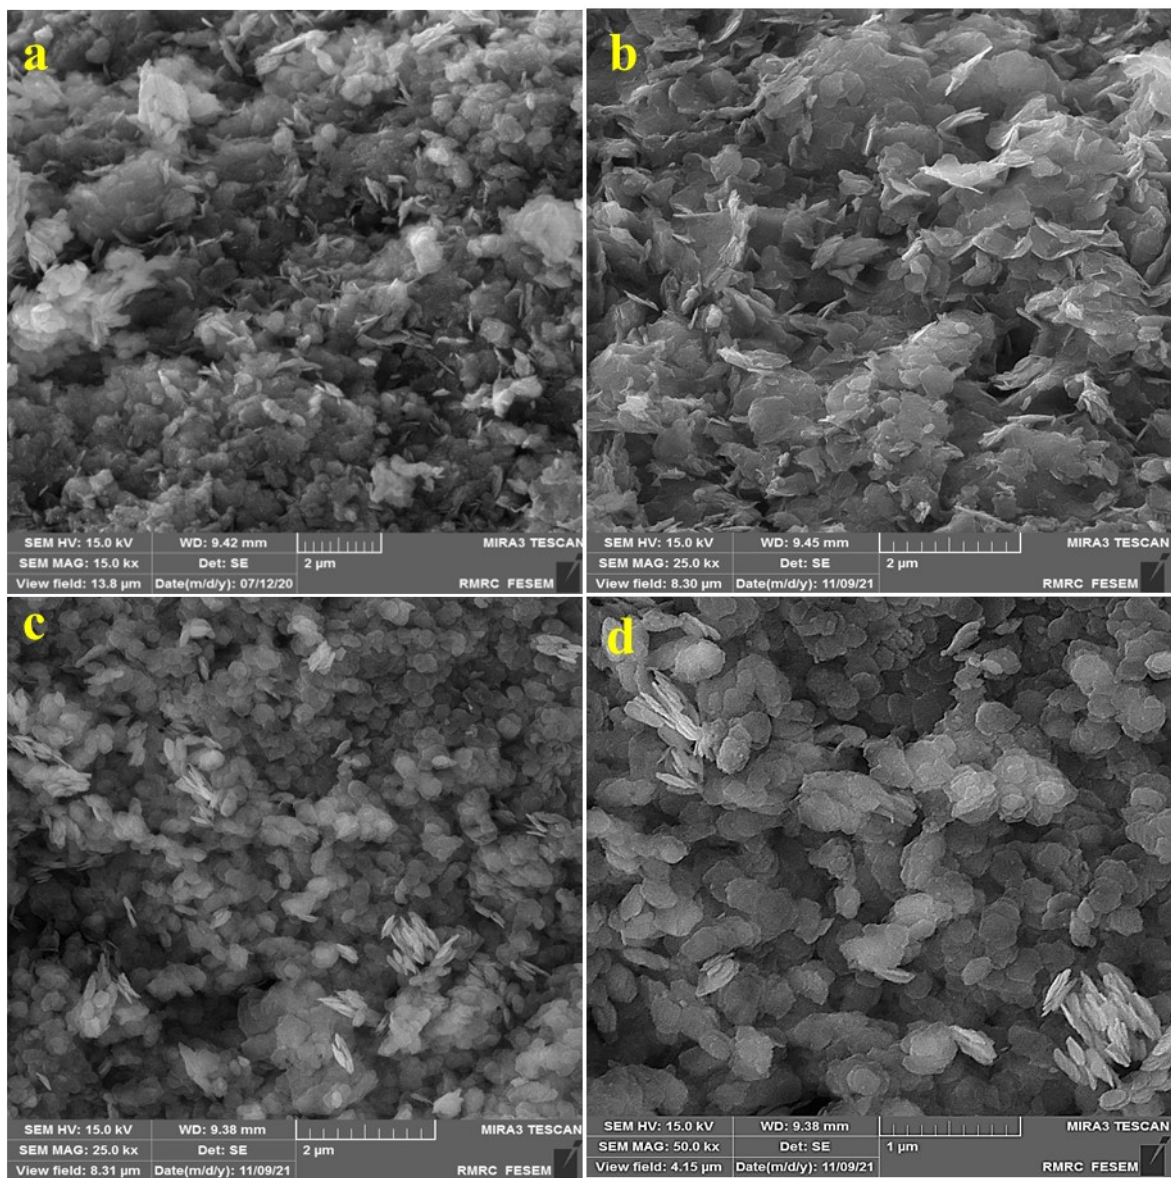

**Fig. S1.** FE-SEM images of NiCo-P NDs (a), NiCo-S NDs (b), and NiCo-Se NDs (c,d).

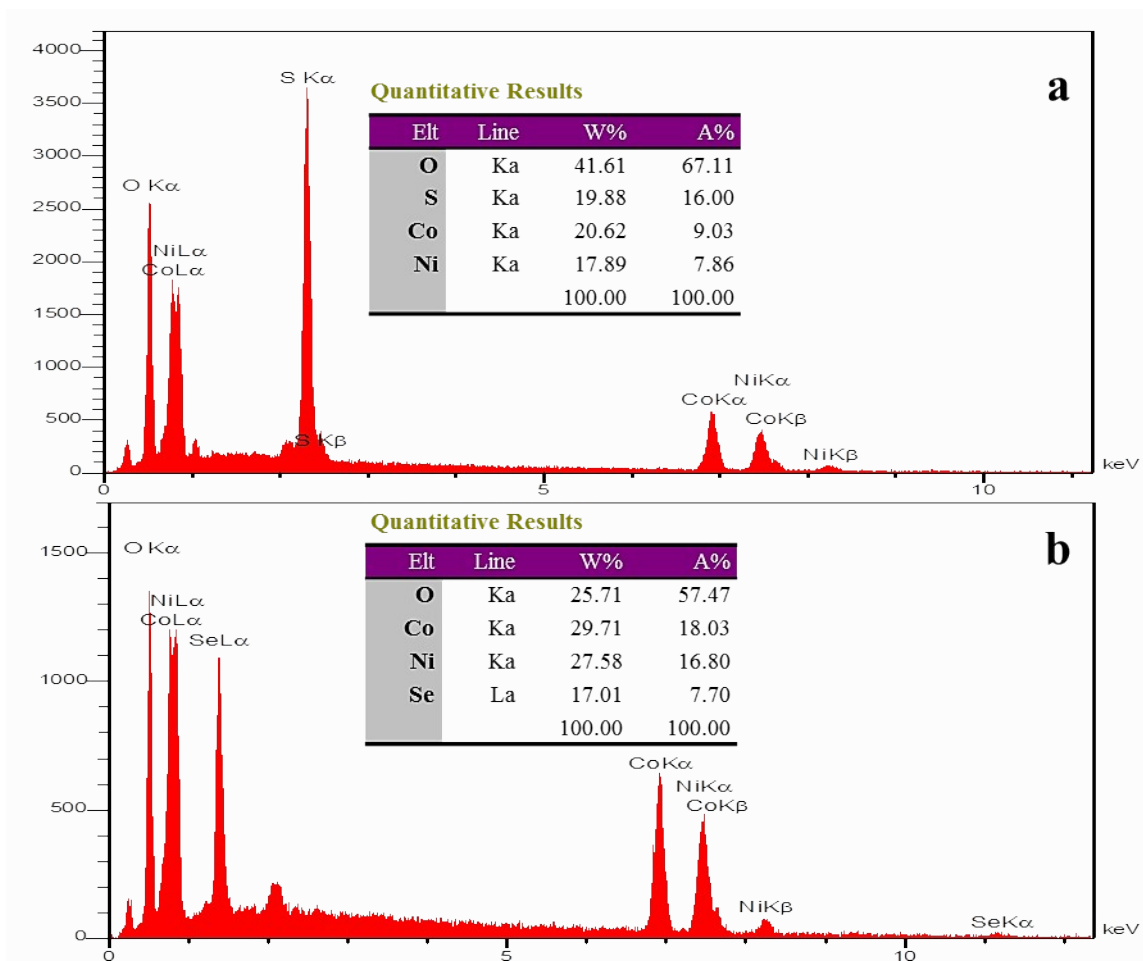

**Fig. S2.** The EDX spectrum of (a) NiCo-S NDs, (b) NiCo-Se NDs nanostructure samples

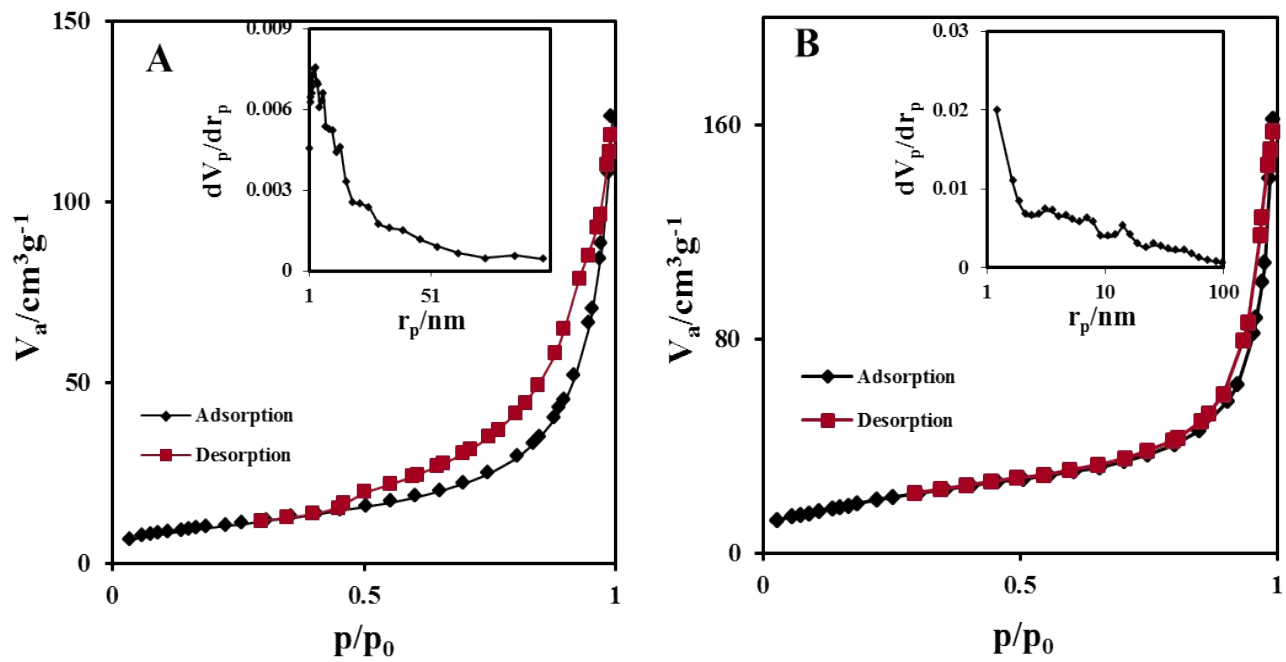

**Fig. S3.** The obtained N<sub>2</sub> adsorption-desorption isotherms of (A) NiCo-S NDs, and (B) NiCo-Se NDs; (inset: related BJH pore-size distribution curve of nanodiscs)

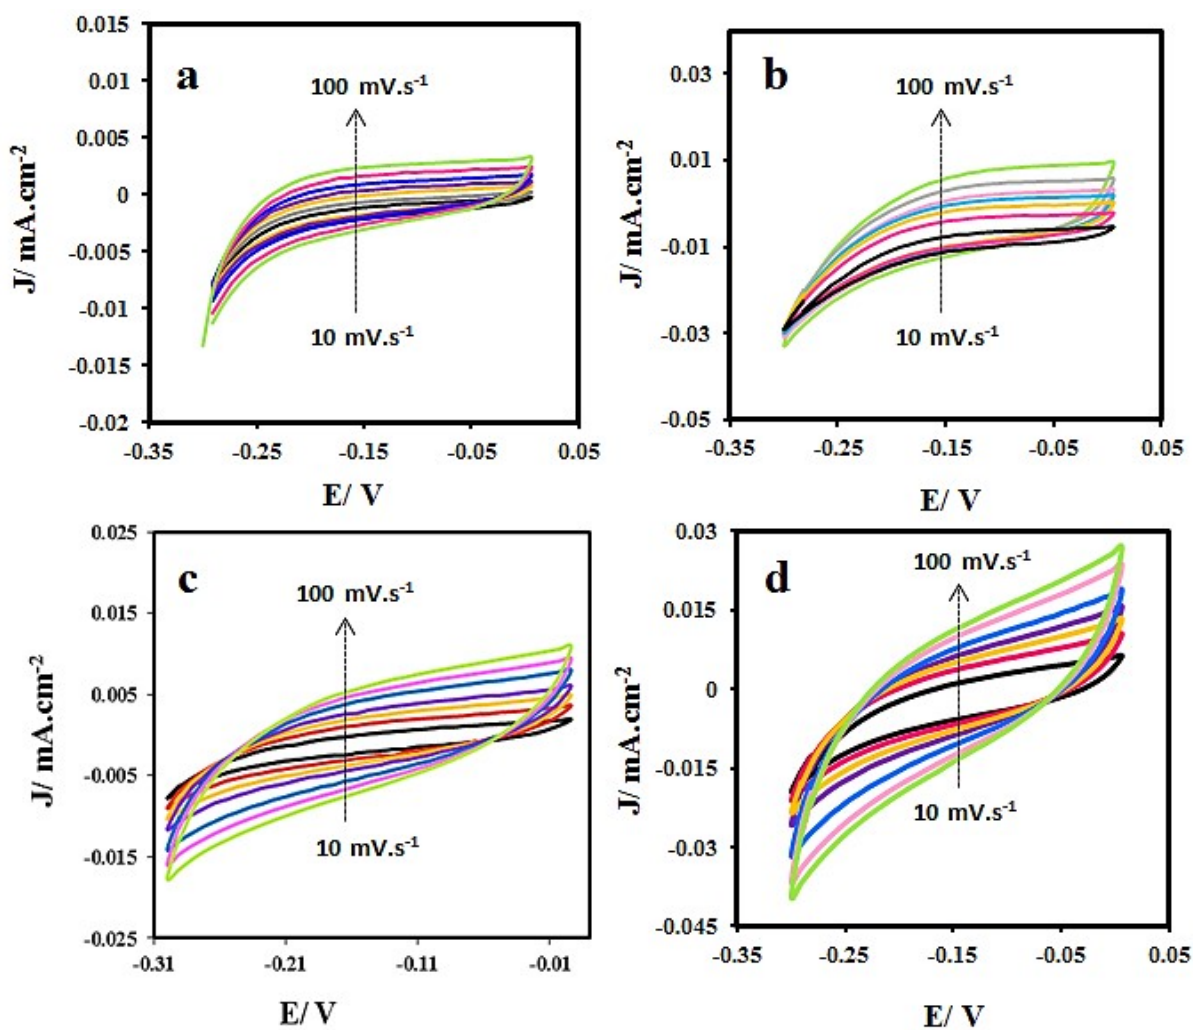

**Fig. S4.** The CV responses of the NiCo-OHNDs/GCE (a), NiCo-SNDs/GCE (b), NiCo-PNDs/GCE (c), and NiCo-SeNDs/GCE (d), at scan rates of 10-100  $\text{mV}\cdot\text{s}^{-1}$  in a potential window without faradaic process.

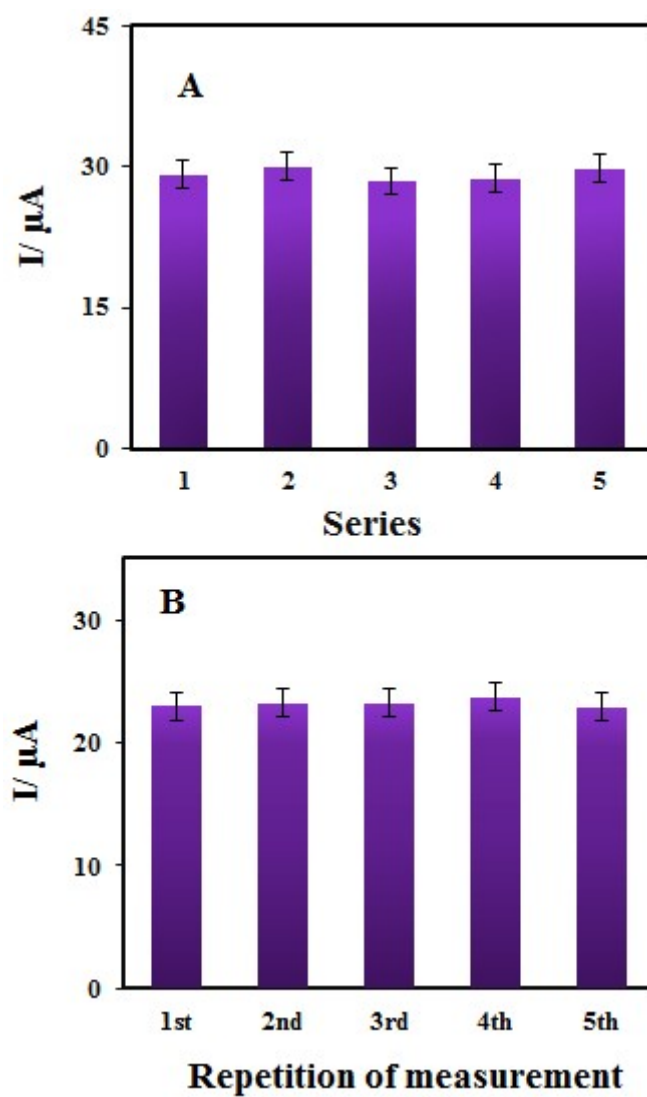

**Fig. S5.** The bar charts: (A) the results of the five identically fabricated NiCo-SeNDs/GCE with IPN (100 $\mu\text{M}$ ), (B) Five repetitive IPN (75  $\mu\text{M}$ ) amperometric measurements with one NiCo-SeNDs/GCE

**Table S1.** Comparison of the previously reported electrochemical sensor for IP detection

| Modified Electrode                                       | Linear Range<br>( $\mu\text{M}$ ) | Detection Limit<br>( $\mu\text{M}$ ) | Reference  |
|----------------------------------------------------------|-----------------------------------|--------------------------------------|------------|
| DHPB <sup>a</sup> /MWCNTs <sup>b</sup> /CPE <sup>c</sup> | 0.3- 125                          | 0.1                                  | [1]        |
| HG <sup>d</sup> /GCE <sup>e</sup>                        | 1- 800                            | 0.5                                  | [2]        |
| CuHCF <sup>f</sup> /CPE                                  | 196- 1070                         | 80                                   | [3]        |
| AuNPs-DAT <sup>g</sup> /GCE                              | 1–1500                            | 0.46                                 | [4]        |
| GZO@GO <sup>h</sup> /GCE                                 | 0.02–122.1                        | 0.003                                | [5]        |
| DMD <sup>i</sup> -AuNPs <sup>j</sup> /GCE                | 0.5- 800                          | 0.21                                 | [6]        |
| (P)DNA <sup>k</sup> /GCE                                 | 0.16                              | 2-60                                 | [7]        |
| CuNPs-GO-CB-PEDOT:PSS <sup>l</sup> /GCE                  | 8- 50                             | 1.9                                  | [8]        |
| CD-TM <sup>m</sup> /CPE                                  | 0.5- 1000                         | 0.47                                 | [9]        |
| NiCo-PNDs@NiCo-OH <sup>n</sup> /GCE                      | 0.5- 2110                         | 0.17                                 | [10]       |
| NiCo-SeNDs/GCE                                           | 0.5-750                           | 0.16                                 | This study |

<sup>a</sup> N-(3,4-dihydroxyphenethyl)-3,5- dinitrobenzamide

<sup>b</sup> Multiwall carbon nanotubes

<sup>c</sup> Carbon paste electrode

<sup>d</sup> Hematoxylin and graphene

<sup>e</sup> Glassy carbon electrode

<sup>f</sup> Copper(II) hexacyanoferrate (III)

<sup>g</sup> 3,4-dihydroxyphenyl-azo-2-thiophenol

<sup>h</sup> Gadolinia doped zinc oxide/ graphene oxide

<sup>i</sup> 5-(1,3-dithiolan-2-eyl)-3-methyl banzen-1,2-diol

<sup>j</sup> Gold nanoparticles

<sup>k</sup> poly(1-methylpyrrole)-DNA

<sup>l</sup> Copper nanoparticles- grahene oxide- carbon black- (3,4 ethylenedioxythiophene)-poly (styrenesulfonate)

<sup>m</sup> (E)-2-((2-chlorophenylimino) methyl) benzene-1,4- diol and TiO<sub>2</sub> nanoparticles

<sup>n</sup> NiCo-P nanodiscs shelled with NiCo-LDH nanosheets

## References

- [1] A.A. Ensafi, H. Bahrami, H. Karimi-Maleh, S. Mallakpour. Carbon paste electrode prepared from chemically modified multiwall carbon nanotubes for the voltammetric determination of isoprenaline in pharmaceutical and urine samples. *Chin J Catal* 33 (2012) 1919-926, [https://doi.org/10.1016/S1872-2067\(11\)60465-8](https://doi.org/10.1016/S1872-2067(11)60465-8).
- [2] H. Beitollahi, H. Salimi, A triple electrochemical platform for simultaneous determination of isoproterenol, acetaminophen and tyrosine based on a glassy carbon electrode modified with hematoxylin and graphene, *J, Electrochem. Soc.* 163 (2016) H1157-H1164, <https://doi.org/10.1149/2.0911614jes>.
- [3] V.G. Bonifacio L.H. Marcolino, M.F. Teixeira, O. Fatibello-Filho, Voltammetric determination of isoprenaline in pharmaceutical preparations using a copper (II) hexacyanoferrate (III) modified carbon paste electrode, *Microchem. J.* 78 (2004) 55-59, <https://doi.org/10.1016/j.microc.2004.03.010>.
- [4] M. Mazloun-Ardakani, M.A. Sheikh-Mohseni, B.F. Mirjalili, R. Ahmadi, M.A. Mirhoseini, A nanocomposite electrocatalyst for the electro-oxidation of isoproterenol and its application as a sensor, *Chinese J. Catal.* 36 (2015) 1273-1279, [https://doi.org/10.1016/S1872-2067\(15\)60918-4](https://doi.org/10.1016/S1872-2067(15)60918-4).
- [5] N. Manjula, S.M. Chen. One-pot synthesis of rod-shaped gadolinia doped zinc oxide decorated on graphene oxide composite as an efficient electrode material for isoprenaline sensor. *Compos. B: Eng.* 211 (2021) 108631.
- [6] M. Mazloun-Ardakani, Z. Dehghani, A. Khoshroo, Self-assembled monolayers of organosulfur derivative on gold nanoparticles as electrochemical sensor for determination of isoprenaline, *J. Iran. Chem. Soc.* 15 (2018) 1061-1068, <https://doi.org/10.1007/s13738-018-1303-5>.



- [7] A. Kutluay, M. Aslanoglu. Electrocatalytic oxidation of isoproterenol and its voltammetric determination in pharmaceuticals and urine samples using a poly (1- methylpyrrole)-DNA modified electrode. *J. Acta. Chim. Slovenica*. 57(2010) 157-162.
- [8] A. Wong, A.M. Santos, T.A. Silva, O. Fatibello-Filho, Simultaneous determination of isoproterenol, acetaminophen, folic acid, propranolol and caffeine using a sensor platform based on carbon black, graphene oxide, copper nanoparticles and PEDOT: PSS, *Talanta*. 183 (2018) 329-338, <https://doi.org/10.1016/j.talanta.2018.02.066>.
- [9] M. Mazloun-Ardakani, L. Hosseinzadeh, A. Khoshroo, H. Naeimi, M. Moradian, Simultaneous determination of isoproterenol, acetaminophen and folic acid using a novel nanostructure-based electrochemical sensor. *Electroanalysis*. 26 (2013) 275-284, <https://doi.org/10.1002/elan.201300401>.
- [10] S. Farokhi, M. Roushani, H. Hosseini, Advanced core-shell nanostructures based on porous NiCo-P nanodiscs shelled with NiCo-LDH nanosheets as a high-performance electrochemical sensing platform. *Electro. Chim. Acta*. 362 (2020) 137218, <https://doi.org/10.1016/j.electacta.2020.137218>.
